# Supplementary material for: Copolymerization of CO2 and epoxides mediated by zinc organyls
Source: Royal Society of Chemistry journal article supplement (doi:10.1039/c7ra12535f), 2018-01-01
Supplement: c7ra12535f1.pdf [file c7ra12535f1.pdf]

# SUPPORTING INFORMATION

## Copolymerization of CO<sub>2</sub> and Epoxides mediated by zinc organyls

Christoph Wulf,<sup>[a]</sup> Ulrike Doering,<sup>[a]</sup> Thomas Werner<sup>\*[a]</sup>

<sup>a</sup> Leibniz-Institut für Katalyse e. V. an der Universität Rostock

Albert-Einstein-Str. 29a, 18059 Rostock, Germany. E-mail: [Thomas.Werner@catalysis.de](mailto:Thomas.Werner@catalysis.de)

### Table of Content

|                                                                                                                                                                                                                           |    |
|---------------------------------------------------------------------------------------------------------------------------------------------------------------------------------------------------------------------------|----|
| Table S1. Optimizing catalyst amount of Zinc organyls. <sup>a</sup> .....                                                                                                                                                 | S1 |
| Table S2. Influence of the solvents and volume-ratios on the copolymerization. <sup>a</sup> .....                                                                                                                         | S1 |
| Table S3. Influence of the reaction time for the copolymerization of CHO and CO <sub>2</sub> . .....                                                                                                                      | S2 |
| Figure S1. MALDI-TOF mass spectrum of polycarbonate obtained after optimized conditions (Table 1, entry 6): zoom of the region $m/z= 1000-3500 m/z$ , picked peaks show multiples of monomer unit with $m/z= 142$ . ..... | S3 |

**Table S1. Optimizing catalyst amount of zinc organyls.<sup>a</sup>**

| Entry | R <sub>2</sub> Zn           | TON | Y <sup>b,c</sup> /% | PC:PE ratio <sup>d</sup> | M <sub>n</sub> / kg·mol <sup>-1e</sup> | Đ <sup>e</sup> |
|-------|-----------------------------|-----|---------------------|--------------------------|----------------------------------------|----------------|
| 1     | Et <sub>2</sub> Zn          | 65  | 6 (<1)              | >99 : <1                 | 43.1                                   | 4.6            |
| 2     | Bu <sub>2</sub> Zn          | 269 | 52 (3)              | 94 : 6                   | 18.7                                   | 4.8            |
| 3     | <i>i</i> Pr <sub>2</sub> Zn | 120 | 16 (<1)             | 90 : 10                  | 15.8                                   | 5.6            |
| 4     | Cy <sub>2</sub> Zn          | 85  | 6 (<1)              | 97 : 3                   | 22.5                                   | 5.2            |
| 5     | Ph <sub>2</sub> Zn          | 44  | 3 (<1)              | 94 : 6                   | 33.1                                   | 2.4            |

<sup>a</sup> Reaction conditions: 50 mmol CHO, 0.25 mol% R<sub>2</sub>Zn, 2 mL toluene,  $p(\text{CO}_2) = 2.0$  MPa,  $T = 100^\circ\text{C}$ ,  $t = 16$  h. <sup>b</sup> Isolated yield of the polymer after precipitation from CH<sub>2</sub>Cl<sub>2</sub> with 5 mol% HCl in MeOH. <sup>c</sup> Yield of CHC determined by <sup>1</sup>H NMR from the reaction mixture in brackets. <sup>d</sup> Determined by comparison of the integrals arising from the methine protons in the <sup>1</sup>H NMR spectra from the PC and PE unit. <sup>e</sup> Determined by SEC in THF, calibrated with polystyrene standards.

**Table S2. Influence of the solvents and volume-ratios on the copolymerization.<sup>a</sup>**

| Entry | Solvent | TON | Y <sup>b,c</sup> /% | PC:PE ratio <sup>d</sup> | M <sub>n</sub> / kg·mol <sup>-1e</sup> | Đ <sup>e</sup> |
|-------|---------|-----|---------------------|--------------------------|----------------------------------------|----------------|
| 1     | -       | 27  | 21 (4)              | 87 : 13                  | 30.8                                   | 3.4            |
| 2     | THF     | 30  | 55 (1)              | 97 : 3                   | 58.9                                   | 3.8            |
| 3     | Toluol  | 30  | 73 (1)              | 97 : 3                   | 31.5                                   | 4.4            |
| 4     | DCM     | 29  | 53 (4)              | 94 : 6                   | 25.6                                   | 4.5            |

<sup>a</sup> Reaction conditions: 25 mmol CHO, 0.25 mol% Et<sub>2</sub>Zn,  $V_{(\text{solvent})} = 1$  mL,  $p(\text{CO}_2) = 3.8$  MPa,  $T = 100^\circ\text{C}$ ,  $t = 16$  h. <sup>b</sup> Isolated yield of the polymer after precipitation from CH<sub>2</sub>Cl<sub>2</sub> with 5 mol% HCl in MeOH. <sup>c</sup> Yield of CHC determined by <sup>1</sup>H NMR from the reaction mixture in brackets. <sup>d</sup> Determined by comparison of the integrals arising from the methine protons in the <sup>1</sup>H NMR spectra from the PC and PE unit. <sup>e</sup> Determined by SEC in THF, calibrated with polystyrene standards.

**Table S3. Influence of the reaction time for the copolymerization of CHO and CO<sub>2</sub>.**

| Entry | R <sub>2</sub> Zn           | t/h | X <sub>CHO</sub> /% | Y <sub>Polymer</sub> <sup>b,c</sup> /% | Y <sub>CHC</sub> <sup>b</sup> /% | CO <sub>2</sub> content/<br>% <sup>d</sup> | M <sub>n</sub> /<br>kg·mol <sup>-1</sup> <sup>e,f</sup> |
|-------|-----------------------------|-----|---------------------|----------------------------------------|----------------------------------|--------------------------------------------|---------------------------------------------------------|
| 1     | Et <sub>2</sub> Zn          | 1   | 31                  | 29 (23)                                | 2                                | 71                                         | 8.9 (15.4)                                              |
| 2     | Et <sub>2</sub> Zn          | 2   | 37                  | 34 (33)                                | 2                                | 90                                         | 11.5 (15.0)                                             |
| 3     | Et <sub>2</sub> Zn          | 4   | 55                  | 51 (49)                                | 4                                | 90                                         | 15.8 (17.3)                                             |
| 4     | Et <sub>2</sub> Zn          | 8   | 55                  | 50 (50)                                | 6                                | 90                                         | 28.3 (32.0)                                             |
| 5     | Et <sub>2</sub> Zn          | 16  | 73                  | 66 (63)                                | 7                                | 87                                         | 9.7 (10.5)                                              |
| 6     | Bu <sub>2</sub> Zn          | 1   | 45                  | 42 (36)                                | 3                                | 71                                         | 13.6 (13.6)                                             |
| 7     | Bu <sub>2</sub> Zn          | 2   | 55                  | 51 (45)                                | 4                                | 87                                         | 7.9 (14.3)                                              |
| 8     | Bu <sub>2</sub> Zn          | 4   | 67                  | 62 (57)                                | 5                                | 87                                         | 13.3 (15.2)                                             |
| 9     | Bu <sub>2</sub> Zn          | 8   | 80                  | 72 (67)                                | 8                                | 84                                         | 10.9 (11.4)                                             |
| 10    | Bu <sub>2</sub> Zn          | 16  | 79                  | 65 (60)                                | 10                               | 77                                         | 14.4 (20.8)                                             |
| 11    | <i>i</i> Pr <sub>2</sub> Zn | 1   | 25                  | 24 (20)                                | 1                                | 87                                         | 5.7 (8.8)                                               |
| 12    | <i>i</i> Pr <sub>2</sub> Zn | 2   | 44                  | 41 (38)                                | 3                                | 87                                         | 10.2 (11.9)                                             |
| 13    | <i>i</i> Pr <sub>2</sub> Zn | 4   | 58                  | 54 (50)                                | 4                                | 90                                         | 8.9 (14.5)                                              |
| 14    | <i>i</i> Pr <sub>2</sub> Zn | 8   | 66                  | 62 (56)                                | 4                                | 90                                         | 9.5 (10.3)                                              |
| 15    | <i>i</i> Pr <sub>2</sub> Zn | 16  | 86                  | 77 (64)                                | 9                                | 87                                         | 5.1 (12.1)                                              |

<sup>a</sup> Reaction conditions: 50 mmol CHO, 0.5 mol% R<sub>2</sub>Zn, 2 mL toluene, *p*(CO<sub>2</sub>)= 2.0 MPa, *T*= 100°C, *t*= 1–48 h. <sup>b</sup> Yield determined by <sup>1</sup>H NMR from the reaction mixture <sup>c</sup> Isolated yield of the polymer after precipitation from CH<sub>2</sub>Cl<sub>2</sub> with 5 mol% HCl in MeOH in brackets. <sup>d</sup> Determined by comparison of the integrals arising from the methine protons in the <sup>1</sup>H NMR spectra from the PC and PE unit. <sup>e</sup> Determined by SEC in THF, calibrated with polystyrene standards. <sup>f</sup> M<sub>n</sub> of the polymer after precipitation from CH<sub>2</sub>Cl<sub>2</sub> with 5 mol% HCl in MeOH in brackets.

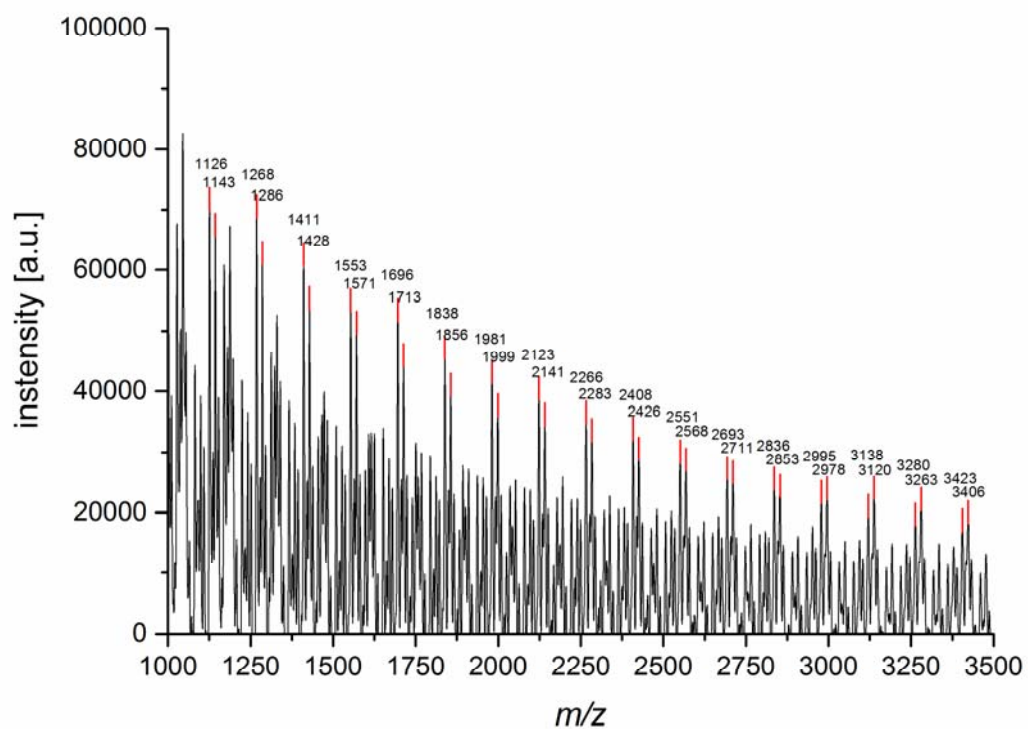

**Figure S1.** MALDI-TOF mass spectrum of polycarbonate obtained after optimized conditions (Table 1, entry 6): zoom of the region  $m/z= 1000\text{--}3500$   $m/z$ , picked peaks show multiples of monomer unit with  $m/z= 142$ .
